# Supplementary material for: Cystoseira compressa and Ericaria mediterranea: Effective Bioindicators for Heavy- and Semi-Metal Monitoring in Marine Environments with Rocky Substrates
Source: MDPI journal article supplement (doi:10.3390/plants13040530), 2024-02-15
Supplement: s1 [file s1]

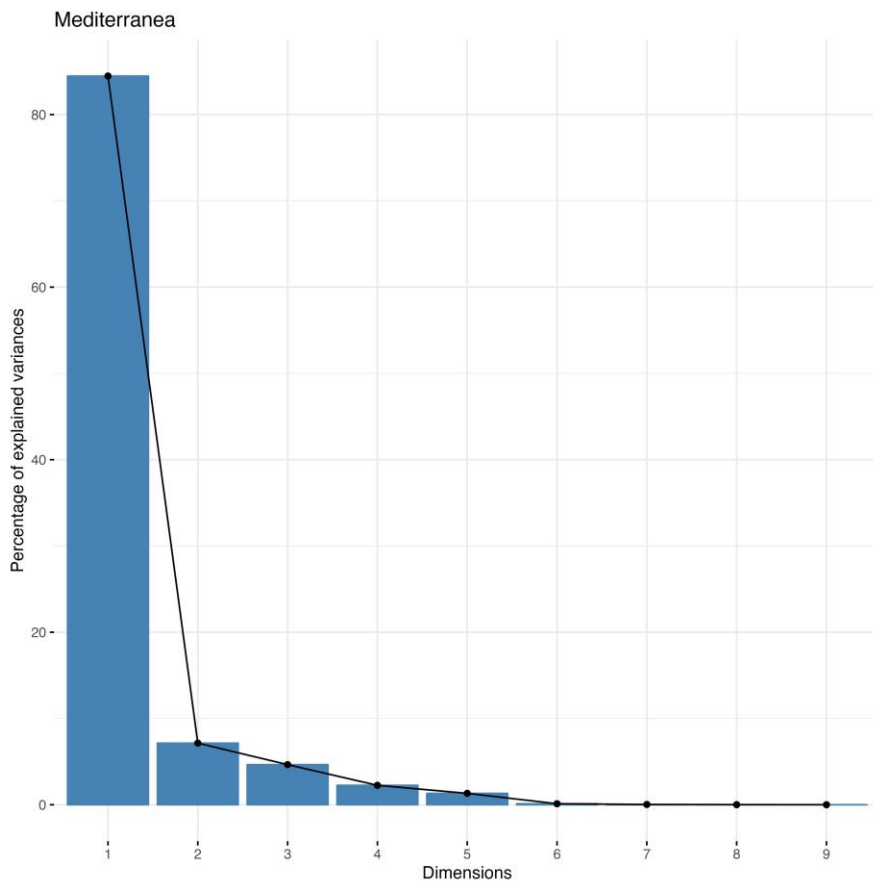

**Figure S1.** Percentage of explained variance across the different dimensions in the calculated PCA for *E. mediterranea*.

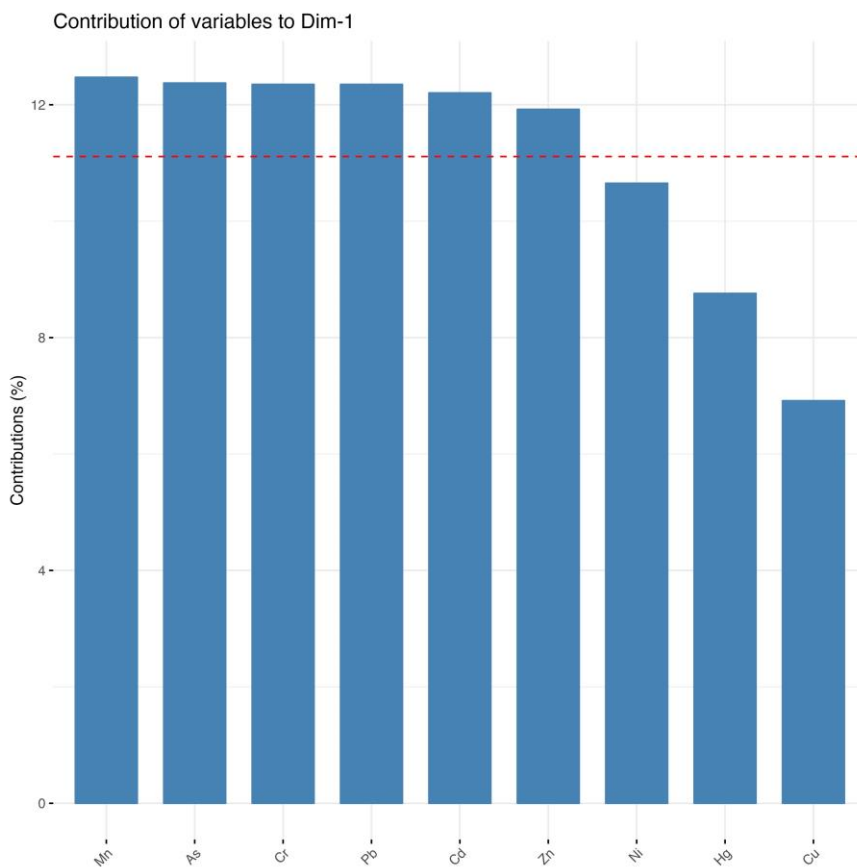

**Figure S2.** Contribution of heavy- and semi-metals to the first dimension in the calculated PCA for *E. mediterranea*.

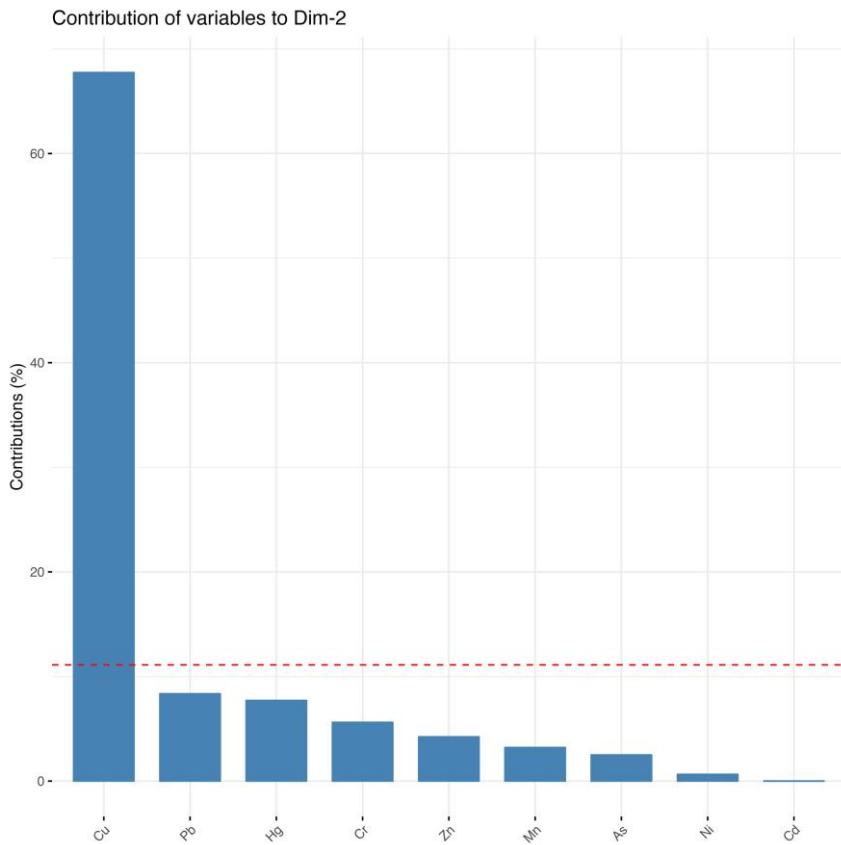

**Figure S3.** Contribution of heavy- and semi-metals to the second dimension in the calculated PCA for *E. mediterranea*.

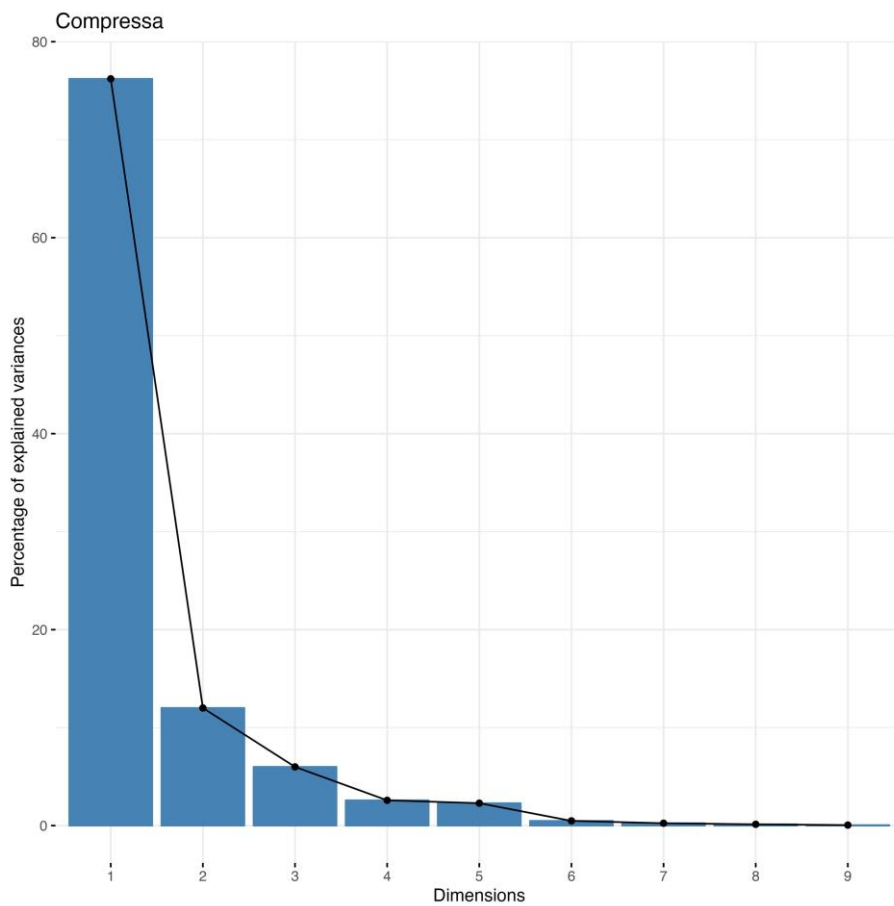

**Figure S4:** Percentage of explained variance across the different dimensions in the calculated PCA for *C. compressa*.

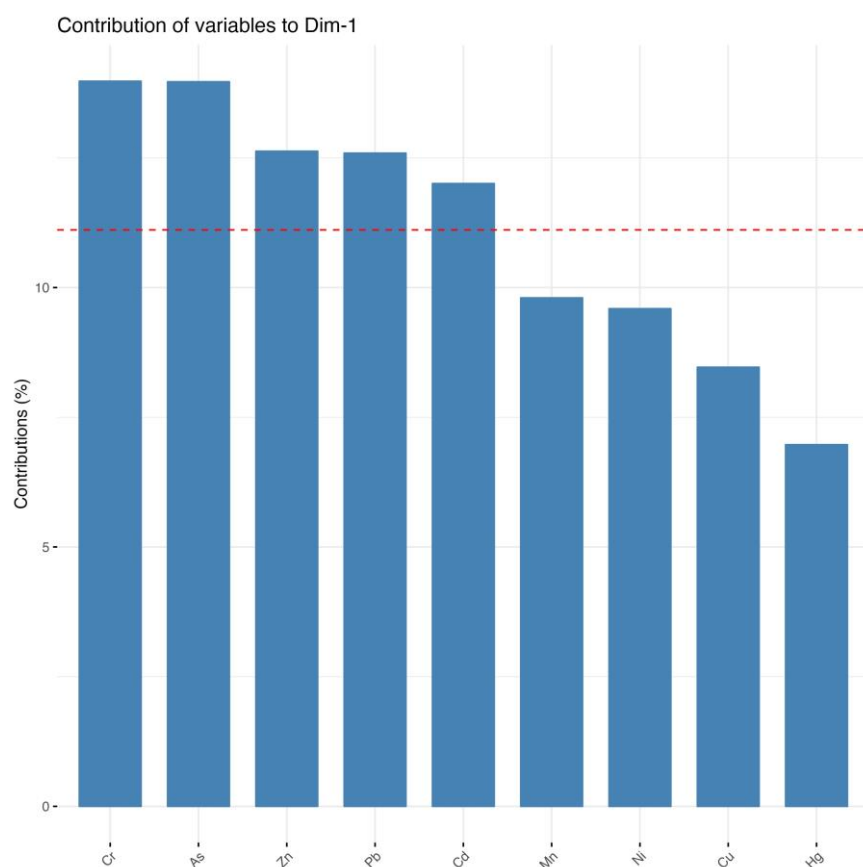

**Figure S5.** Contribution of heavy- and semi-metals to the first dimension in the calculated PCA for *C. compressa*.

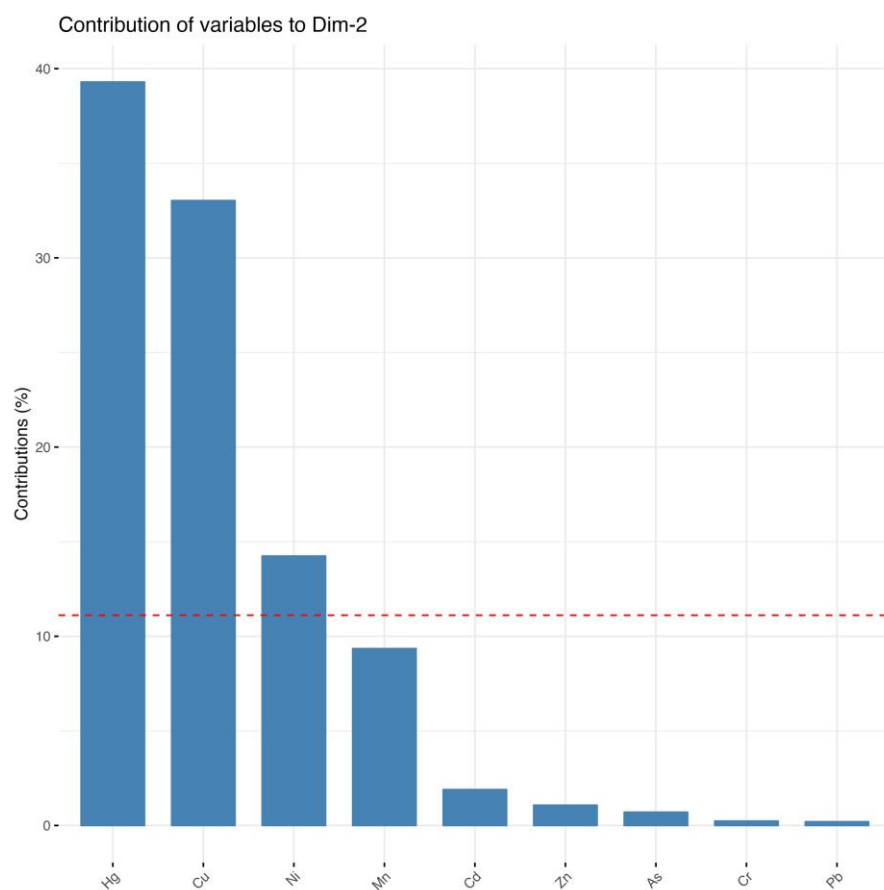

**Figure S6.** Contribution of heavy- and semi-metals to the second dimension in the calculated PCA for *C. compressa*.
