# Supplementary material for: Cystoseira compressa and Ericaria mediterranea: Effective Bioindicators for Heavy- and Semi-Metal Monitoring in Marine Environments with Rocky Substrates
Source: Plants (Basel). 2024 Feb 15;13(4):530. doi: 10.3390/plants13040530 (PMC10893443; doi:10.3390/plants13040530)
Supplement: Supplementary file 1 [file plants-13-00530-s001.zip › Table S1.xlsx]

## Sheet: C. compressa
Site	Algal part	Mean value	SE	df	lower.CL	upper.CL	Signif.	Element
CM	Frond	3.08951	0.169239	28	2.74284	3.43618	a	As
CM	Base	3.61397	0.197969	28	3.20845	4.01949	a	As
PM	Frond	3.81993	0.209251	28	3.3913	4.24856	a	As
PM	Base	9.4791	0.519253	28	8.41546	10.5427	b	As
PM	Frond	0.708375	0.274117	28	0.146873	1.26988	a	Mn
CM	Frond	1.14088	0.274117	28	0.579373	1.70238	a	Mn
CM	Base	3.75825	0.274117	28	3.19675	4.31975	b	Mn
PM	Base	4.73837	0.274117	28	4.17687	5.29988	b	Mn
CM	Frond	0.122125	0.0378897	28	0.0445114	0.199739	a	Cd
CM	Base	0.161875	0.0378897	28	0.0842614	0.239489	a	Cd
PM	Frond	0.235375	0.0378897	28	0.157761	0.312989	a	Cd
PM	Base	0.5845	0.0378897	28	0.506886	0.662114	b	Cd
CM	Frond	0.237625	0.043142	28	0.149253	0.325997	a	Cu
PM	Frond	0.24875	0.043142	28	0.160378	0.337122	a	Cu
CM	Base	0.345	0.043142	28	0.256628	0.433372	ab	Cu
PM	Base	0.503375	0.043142	28	0.415003	0.591747	b	Cu
CM	Frond	0.0880655	0.0173047	28	0.0526185	0.123513	a	Cr
PM	Frond	0.128246	0.0252	28	0.0766258	0.179866	a	Cr
CM	Base	0.133059	0.0261459	28	0.0795019	0.186617	a	Cr
PM	Base	1.74916	0.343706	28	1.04511	2.4532	b	Cr
CM	Frond	0.00110623	0.00036018	28	0.000368439	0.00184403	a	Hg
CM	Base	0.00110623	0.00036018	28	0.000368439	0.00184403	a	Hg
PM	Frond	0.00416681	0.000699033	28	0.00273491	0.00559872	b	Hg
PM	Base	0.00729982	0.000925235	28	0.00540456	0.00919508	b	Hg
CM	Frond	1.768	0.171125	28	1.41747	2.11853	a	Ni
PM	Frond	2.51512	0.171125	28	2.16459	2.86566	b	Ni
CM	Base	2.65263	0.171125	28	2.30209	3.00316	b	Ni
PM	Base	3.74812	0.171125	28	3.39759	4.09866	c	Ni
PM	Frond	0.0811649	0.0177932	28	0.0447172	0.117613	a	Pb
CM	Base	0.204396	0.0448084	28	0.112611	0.296182	a	Pb
CM	Frond	0.204969	0.044934	28	0.112926	0.297012	a	Pb
PM	Base	1.76978	0.387978	28	0.975048	2.56452	b	Pb
PM	Frond	0.4885	0.114875	28	0.253189	0.723811	a	Zn
CM	Frond	0.49125	0.114875	28	0.255939	0.726561	a	Zn
CM	Base	1.0415	0.114875	28	0.806189	1.27681	b	Zn
PM	Base	2.03388	0.114875	28	1.79856	2.26919	c	Zn

## Sheet: E. mediterranea
Site	Algal part	Mean value	SE	df	lower.CL	upper.CL	Signif.	Element
Br	Base	3.47538	0.307874	28	2.84472	4.10603	a	As
PM	Frond	4.82113	0.307874	28	4.19047	5.45178	b	As
Br	Frond	5.02175	0.307874	28	4.3911	5.6524	b	As
PM	Base	10.1811	0.307874	28	9.55047	10.8118	c	As
Br	Base	0.007375	0.0316566	28	0.01	0.0722206	a	Cd
Br	Frond	0.01275	0.0316566	28	0.01	0.0775956	a	Cd
PM	Frond	0.175375	0.0316566	28	0.110529	0.240221	b	Cd
PM	Base	0.621625	0.0316566	28	0.556779	0.686471	c	Cd
Br	Frond	0.160213	0.0125237	28	0.13456	0.185867	a	Cr
PM	Frond	0.259089	0.0202528	28	0.217603	0.300575	b	Cr
Br	Base	0.289862	0.0226583	28	0.243449	0.336276	b	Cr
PM	Base	1.86875	0.146079	28	1.56952	2.16798	c	Cr
Br	Base	0.0195	0.0187092	28	0.01	0.057824	a	Cu
Br	Frond	0.06225	0.0187092	28	0.023926	0.100574	a	Cu
PM	Frond	0.419	0.0187092	28	0.380676	0.457324	b	Cu
PM	Base	0.451375	0.0187092	28	0.413051	0.489699	b	Cu
Br	Base	0.003	0.000656781	28	0.00165464	0.00434536	a	Hg
PM	Frond	0.003875	0.000656781	28	0.00252964	0.00522036	ab	Hg
Br	Frond	0.006125	0.000656781	28	0.00477964	0.00747036	b	Hg
PM	Base	0.011875	0.000656781	28	0.0105296	0.0132204	c	Hg
Br	Base	0.063354	0.00616546	28	0.0507246	0.0759833	a	Mn
Br	Frond	0.351939	0.0342498	28	0.281781	0.422096	b	Mn
PM	Frond	2.58235	0.251309	28	2.06757	3.09714	c	Mn
PM	Base	6.77019	0.658859	28	5.42058	8.1198	d	Mn
Br	Frond	1.1415	0.169789	28	0.793702	1.4893	a	Ni
PM	Frond	1.96675	0.169789	28	1.61895	2.31455	b	Ni
Br	Base	2.356	0.169789	28	2.0082	2.7038	b	Ni
PM	Base	4.34863	0.169789	28	4.00083	4.69642	c	Ni
PM	Frond	0.0801814	0.00573554	28	0.0684327	0.0919302	a	Pb
Br	Frond	0.110176	0.00788113	28	0.0940324	0.12632	b	Pb
Br	Base	0.151803	0.0108588	28	0.12956	0.174047	c	Pb
PM	Base	1.67078	0.119515	28	1.42597	1.9156	d	Pb
Br	Base	0.156	0.266575	28	0.01	0.702054	a	Zn
Br	Frond	0.289625	0.266575	28	0.01	0.835679	a	Zn
PM	Frond	1.1685	0.266575	28	0.622446	1.71455	a	Zn
PM	Base	3.10938	0.266575	28	2.56332	3.65543	b	Zn
