# Supplementary material for: Cystoseira compressa and Ericaria mediterranea: Effective Bioindicators for Heavy- and Semi-Metal Monitoring in Marine Environments with Rocky Substrates
Source: Plants (Basel). 2024 Feb 15;13(4):530. doi: 10.3390/plants13040530 (PMC10893443; doi:10.3390/plants13040530)
Supplement: Supplementary file 1 [file plants-13-00530-s001.zip › Table S2.xlsx]

## Sheet: Tabella BAF
Bioaccumulation factor (BAF)
Site	Species	Sampling date	Hg	Cu	Cd	Cr	Pb	Zn	As	Mn	Ni
CM	C. compressa frond	2022-01-28	ND	0.234139	8.67308	12.85	111.353	0.306284	ND	1.40173	67.9062
	C. compressa base		ND	0.365559	8.03846	9.65	21.5882	0.633738	ND	3.44083	61
	C. compressa frond	2022-04-29	ND	1.64378	0	11.0909	ND	0.185976	ND	2.70155	79.4286
	C. compressa base		ND	2.28942	0	28.9091	ND	0.41372	ND	11.3721	180.829
	C. compressa frond	2022-07-19	ND	0.981443	6.44	12.8333	5.5	0.205453	ND	1.50302	79.7632
	C. compressa base		ND	1.44948	12.28	25.5833	16.25	0.453907	ND	6.08069	165.289
	C. compressa frond	2022-09-13	ND	0.789313	17.3636	22.3333	44.2667	0.312419	ND	2.52584	166.125
	C. compressa base		ND	1.09008	28.2727	29.7778	39.1333	0.647227	ND	7.4672	196.125
PM	C. compressa frond	2022-01-27	ND	0.249147	4.07143	4.63636	6.38095	0.12503	ND	0.150538	85.1948
	C. compressa base		ND	3.76109	35.8333	180.455	195.81	0.963255	ND	5.37691	103.597
	C. compressa frond	2022-04-08	ND	8.30088	124.615	39.4375	48	0.342204	ND	5.616	92.2857
	C. compressa base		ND	9.23009	159.231	222.187	814.667	1.58478	ND	24.2446	196.833
	C. compressa frond	2022-07-28	ND	0.423841	10.6923	5.27778	11.6667	0.321594	ND	0.306471	122.133
	C. compressa base		ND	5.07285	75.1538	147.389	342.111	0.695059	ND	6.59463	138.267
	C. compressa frond	2022-10-03	ND	4.94595	ND	54.8462	23.3	0.338778	ND	2.8833	77.5741
	C. compressa base		ND	6.03243	ND	307.846	338.3	1.42016	ND	13.2741	139.241
Br	E. mediterranea frond	2022-03-11	ND	0.27376	ND	0.00550459	ND	1.07004	ND	0.0203735	0.00351351
	E. mediterranea base		ND	0.10566	ND	33.9333	ND	0.0628409	ND	0.666667	155.654
	E. mediterranea frond	2022-05-05	ND	0.577093	ND	18.05	ND	0.0927595	ND	2.26966	56.2973
	E. mediterranea base		ND	0.176211	ND	28.15	ND	0.050808	ND	0.479401	128.757
	E. mediterranea frond	2022-07-22	ND	0.596059	ND	20.8421	ND	0.116037	ND	3.88546	70.6562
	E. mediterranea base		ND	0.226601	ND	29.3158	ND	0.0497056	ND	0.444934	148.375
	E. mediterranea frond	2022-09-07	ND	0.613333	ND	11.4286	ND	0.0993271	ND	3.24454	104.591
	E. mediterranea base		ND	0.186667	ND	25.3214	ND	0.055431	ND	0.650655	240.409
PM	E. mediterranea frond	2022-03-07	ND	14.2667	ND	32.4286	ND	2.10277	ND	142.179	132.513
	E. mediterranea base		ND	11.8533	ND	420.857	ND	4.44111	ND	394.643	246.795
	E. mediterranea frond	2022-04-08	ND	6.15044	80.9231	33.4375	42.2222	0.283521	ND	8.77486	74.1667
	E. mediterranea base		ND	7.76106	148.769	176.688	643.778	1.33743	ND	20.6834	170.357
	E. mediterranea frond	2022-07-28	ND	6.4702	24.5385	27.8889	18.7778	0.793066	ND	6.50061	99.6667
	E. mediterranea base		ND	5.80795	103.231	238.889	390.889	1.88534	ND	20.514	235.756
	E. mediterranea frond	2022-10-03	ND	3.2973	ND	45.6154	20.3	0.278231	ND	4.68737	54.9259
	E. mediterranea base		ND	5.23243	ND	209.615	259	1.20614	ND	10.7206	137.037
ND: Not Detectable
